# Supplementary material
Source: HighWire-hosted journal article supplement (https://bmjopen.bmj.com/content/6/12/e013755)
Supplement: inline-supplementary-material-1 [file inline-supplementary-material-1.pdf]

## Appendix 1

Table 1: Draft of initial appraisal tool (with example) for prospective studies

[illegible]

Table 2: Data extraction tool (with example) for articles addressing Question 1: Prognosis and Survival

| <b>Title</b>                                                                                                    | <b>Primary Author /<br/>Year</b> | <b>Type of paper</b> | <b>Parameters studied</b>                                | <b>Population</b>                                       | <b>Context</b>       | <b>Methods</b>                                                                                         | <b>Main Findings /<br/>Comments</b>                                                                 |
|-----------------------------------------------------------------------------------------------------------------|----------------------------------|----------------------|----------------------------------------------------------|---------------------------------------------------------|----------------------|--------------------------------------------------------------------------------------------------------|-----------------------------------------------------------------------------------------------------|
| A clinical score to predict 6-month prognosis in elderly patients starting dialysis for end-stage renal disease | Couchod C; 2008                  | Clinical Research    | 6 – month mortality; using a calculated prognostic score | >75 yrs; Started dialysis between 2002 to 2006. N= 2500 | Patients on dialysis | Prospective observational registry – based; tested prognostic variables, derived score; then validated | Median score was 2 points –mortality 17% ; Mortality varied from 8% to 70% according to score group |
|                                                                                                                 |                                  |                      |                                                          |                                                         |                      |                                                                                                        |                                                                                                     |
|                                                                                                                 |                                  |                      |                                                          |                                                         |                      |                                                                                                        |                                                                                                     |

Table 3 Data extraction tool (with example) for studies answering Question 2(a) – factors influencing quality of life

| <b>Title (Year)</b>                                                                       | <b>Primary Author</b> | <b>Type of paper</b> | <b>Factors studied</b>              | <b>Population</b>                                  | <b>Context</b>                                   | <b>Methods</b>            | <b>Main Findings / Comments</b>                                        |
|-------------------------------------------------------------------------------------------|-----------------------|----------------------|-------------------------------------|----------------------------------------------------|--------------------------------------------------|---------------------------|------------------------------------------------------------------------|
| CKD in Elderly Patients Managed without Dialysis: Survival, Symptoms, and Quality of Life | Brown M; 2015         | Clinical Research    | Survival, Symptoms, quality of life | >75 yrs; Cons. versus dialysis at time of decision | Pre - dialysis clinics, Palliative renal clinics | Prospective observational | Non-dialysis patients had stable QOL compared to pre-dialysis patients |
|                                                                                           |                       |                      |                                     |                                                    |                                                  |                           |                                                                        |

Table 4 Data extraction tool (with example) for studies answering Question 2(b) – Lived experience of dialysis / non-dialysis care

| <b>Title (Year)</b>                                                                                                      | <b>Primary Author</b> | <b>Type of paper</b>                  | <b>Aim/Scope</b>                                                                        | <b>Population</b>                  | <b>Context</b>  | <b>Methods</b>                   | <b>Main Findings / Themes / Comments</b>                                     |
|--------------------------------------------------------------------------------------------------------------------------|-----------------------|---------------------------------------|-----------------------------------------------------------------------------------------|------------------------------------|-----------------|----------------------------------|------------------------------------------------------------------------------|
| Meaning, comprehension, and manageability of end-stage renal disease in older adults living with long-term hemodialysis. | Karolich R; 2010      | Quantitative and Qualitative Research | The association between perceived meaning of chronic illness and adherence to treatment | 100 'elderly' patients on dialysis | Dialysis clinic | Surveys; face-to-face interviews | Subjective meanings attached to illness influence how the illness is managed |
|                                                                                                                          |                       |                                       |                                                                                         |                                    |                 |                                  |                                                                              |

Table 5 Data extraction tool (with incomplete example) for studies answering Question 3

| <b>Title (Year)</b>                                                                                     | <b>Primary Author</b> | <b>Type of paper</b> | <b>Aim/Scope</b>                                                                                                                                        | <b>Population</b>                                                     | <b>Context</b>                                   | <b>Methods</b>                        | <b>Main Findings / Themes / Comments</b> |
|---------------------------------------------------------------------------------------------------------|-----------------------|----------------------|---------------------------------------------------------------------------------------------------------------------------------------------------------|-----------------------------------------------------------------------|--------------------------------------------------|---------------------------------------|------------------------------------------|
| Discussions of the Kidney Disease Trajectory by Elderly Patients and Nephrologists: A Qualitative Study | Schell,J;<br>2012     | Qualitative Research | To describe how nephrologists and older patients discuss and understand the prognosis and course of kidney disease leading to renal replacement therapy | 11 nephrologists and 29 patients (aged > 65); with CKD or on dialysis | Pre - dialysis clinics, Palliative renal clinics | Focus groups; face-to-face interviews | Patient - reported themes were....       |
|                                                                                                         |                       |                      |                                                                                                                                                         |                                                                       |                                                  |                                       |                                          |
